# Supplementary material for: Changes in the nanoparticle uptake and distribution caused by an intramacrophagic parasitic infection
Source: Royal Society of Chemistry journal article supplement (doi:10.1039/d1nr03797h), 2021-01-01
Supplement: d1nr03797h1.pdf [file d1nr03797h1.pdf]

## Supplementary material

Table 1. Primers used for parasite burden quantification.

|            | Sense primer (5'-3')    | Antisense primer (5'-3') |
|------------|-------------------------|--------------------------|
| β-actin    | CGCGTCCACCCGCGAG        | CCTGGTGCCTAGGGCG         |
| Leish 18S  | CCAAAGTGTGGAGATCGAAG    | GGCCGGTAAAGGCCGAATAG     |
| Leish kDNA | CCTATTTTACACCAACCCCAAGT | GGGTAGGGGCGTTCTGCGAAA    |

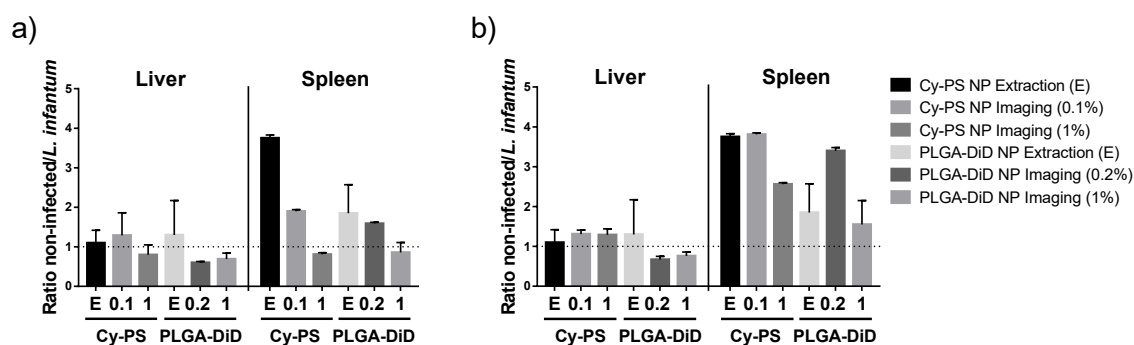

Figure 1. Dye quantification ratios (non-infected/*L. infantum*-infected) comparing results obtained by dye extraction and quantification (NP of low dye loading), and PhotonImager™ ex vivo fluorescence intensity (low and high dye loadings). a) Imaging ratios expressed as ph/cm<sup>2</sup>. b) Imaging ratios expressed as ph/g organ. Data are expressed as mean ± SD (n = 4).

Table 2. Percentage of the different cell subsets in blood of a) non-infected and b) *L. infantum*-infected mice before and after 4 h i.v. administration of PS NP at 0.2 mg/kg of Cy5.5 or PLGA NP at 0.5 mg/kg of DiD. Data are presented as mean ± SD (n = at least 4). Data were analysed using a non-parametric Mann Whitney test. \*\*\*\*p < 0.0001.

| a)              | non-infected       | non-infected<br>+ PS NP       | non-infected<br>+ PLGA NP       |
|-----------------|--------------------|-------------------------------|---------------------------------|
| B cells         | 11.3 ± 3.8         | 12.1 ± 4.0                    | 11.5 ± 3.6                      |
| PMN             | 30.5 ± 3.0         | 58.9 ± 4.2****                | 48.4 ± 5.6****                  |
| Ly6C- monocytes | 1.7 ± 0.4          | 5.8 ± 1.8                     | 2.3 ± 0.6                       |
| Ly6C+ monocytes | 6.0 ± 1.0          | 3.3 ± 0.5                     | 6.4 ± 1.5                       |
| b)              | <i>L. infantum</i> | <i>L. infantum</i><br>+ PS NP | <i>L. infantum</i><br>+ PLGA NP |
| B cells         | 5.4 ± 1.3          | 5.9 ± 1.3                     | 10.9 ± 5.7                      |
| PMN             | 23.7 ± 8.2         | 46.7 ± 14.7****               | 51.5 ± 6.9****                  |
| Ly6C- monocytes | 3.1 ± 1.3          | 1.6 ± 0.9                     | 1.8 ± 1.0                       |
| Ly6C+ monocytes | 5.2 ± 1.6          | 7.2 ± 3.4                     | 6.8 ± 2.7                       |

Table 3. Percentage of the different cell subsets in the spleen of a) non-infected and b) *L. infantum*-infected mice before and after 4 h i.v. administration of PS NP at 0.2 mg/kg of Cy5.5 or PLGA NP at 0.5 mg/kg of DiD. Data are presented as mean  $\pm$  SD (n = at least 4).

| a)              | non-infected   | non-infected + PS NP | non-infected + PLGA NP |
|-----------------|----------------|----------------------|------------------------|
| B cells         | 42.3 $\pm$ 4.9 | 43.8 $\pm$ 5.8       | 45.3 $\pm$ 3.5         |
| PMN             | 7.1 $\pm$ 3.8  | 7.5 $\pm$ 3.0        | 7.3 $\pm$ 1.6          |
| Ly6C- monocytes | 2.0 $\pm$ 0.6  | 2.8 $\pm$ 0.8        | 2.1 $\pm$ 0.4          |
| Ly6C+ monocytes | 2.1 $\pm$ 0.5  | 4.0 $\pm$ 1.2        | 2.3 $\pm$ 0.5          |
| RPM             | 0.6 $\pm$ 0.3  | 0.7 $\pm$ 0.3        | 0.7 $\pm$ 0.3          |
| pDC             | 0.5 $\pm$ 0.2  | 0.2 $\pm$ 0.1        | 0.7 $\pm$ 0.2          |
| mDC             | 1.2 $\pm$ 0.4  | 0.8 $\pm$ 0.2        | 0.8 $\pm$ 0.1          |

  

| b)              | <i>L. infantum</i> | <i>L. infantum</i> + PS NP | <i>L. infantum</i> + PLGA NP |
|-----------------|--------------------|----------------------------|------------------------------|
| B cells         | 51.6 $\pm$ 6.1     | 54.9 $\pm$ 6.0             | 55.0 $\pm$ 8.8               |
| PMN             | 5.1 $\pm$ 1.0      | 8.3 $\pm$ 3.2              | 3.7 $\pm$ 1.6                |
| Ly6C- monocytes | 1.8 $\pm$ 0.4      | 1.5 $\pm$ 0.7              | 1.4 $\pm$ 0.4                |
| Ly6C+ monocytes | 3.5 $\pm$ 0.7      | 2.5 $\pm$ 0.7              | 2.6 $\pm$ 0.3                |
| RPM             | 0.1 $\pm$ 0.1      | 0.2 $\pm$ 0.1              | 0.1 $\pm$ 0.1                |
| pDC             | 0.6 $\pm$ 0.2      | 0.7 $\pm$ 0.2              | 1.5 $\pm$ 0.5                |
| mDC             | 1.3 $\pm$ 0.3      | 1.5 $\pm$ 0.2              | 2.1 $\pm$ 0.2                |

Table 4. Percentage of the different cell subsets in BM of non-infected and *L. infantum*-infected mice before and after 4 h i.v. administration of PS NP at 0.2 mg/kg of Cy5.5 or PLGA NP at 0.5 mg/kg of DiD. Data are presented as mean  $\pm$  SD (n = at least 4). Data were analysed using a non-parametric Mann Whitney test. \*\*\*\* $p$  < 0.0001.

| a)              | non-infected   | non-infected + PS NP | non-infected + PLGA NP |
|-----------------|----------------|----------------------|------------------------|
| B cells         | 34.3 $\pm$ 5.9 | 30.3 $\pm$ 2.7       | 35.8 $\pm$ 4.1         |
| PMN             | 40.9 $\pm$ 7.2 | 40.9 $\pm$ 4.6       | 36.6 $\pm$ 2.7         |
| Ly6C- monocytes | 5.4 $\pm$ 1.2  | 5.2 $\pm$ 1.5        | 4.1 $\pm$ 0.5          |
| Ly6C+ monocytes | 4.7 $\pm$ 0.9  | 7.3 $\pm$ 2.4        | 4.7 $\pm$ 0.7          |
| RPM             | 6.1 $\pm$ 2.4  | 4.3 $\pm$ 0.6        | 4.3 $\pm$ 0.6          |
| pDC             | 1.9 $\pm$ 0.5  | 1.3 $\pm$ 0.3        | 1.7 $\pm$ 0.1          |

  

| b)              | <i>L. infantum</i> | <i>L. infantum</i> + PS NP | <i>L. infantum</i> + PLGA NP |
|-----------------|--------------------|----------------------------|------------------------------|
| B cells         | 27.6 $\pm$ 4.2     | 25.2 $\pm$ 3.7             | 26.8 $\pm$ 5.4               |
| PMN             | 31.6 $\pm$ 6.7     | 40.8 $\pm$ 2.4****         | 34.5 $\pm$ 7.4               |
| Ly6C- monocytes | 4.7 $\pm$ 1.7      | 4.4 $\pm$ 1.6              | 3.0 $\pm$ 0.6                |
| Ly6C+ monocytes | 7.6 $\pm$ 1.0      | 8.5 $\pm$ 1.6              | 8.2 $\pm$ 1.5                |
| RPM             | 1.5 $\pm$ 1.5      | 5.1 $\pm$ 1.8              | 4.1 $\pm$ 0.8                |

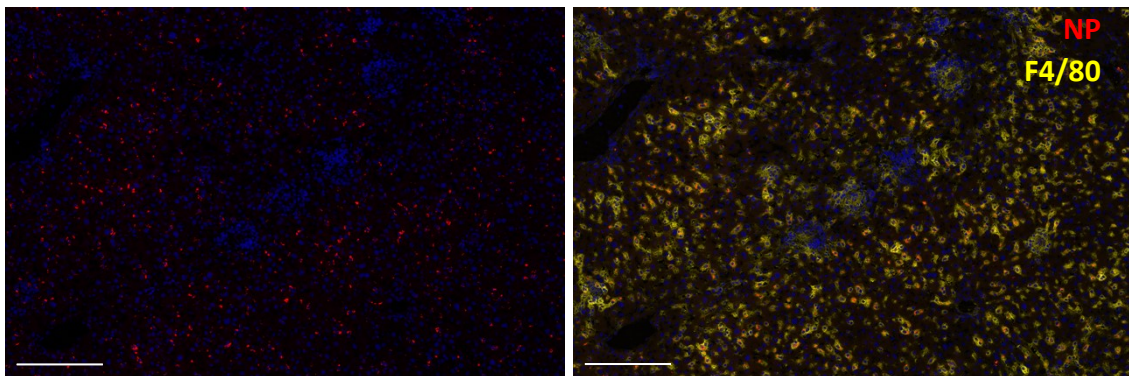

Figure 2. Immunofluorescence images of livers stained with F4/80 (in yellow), showing the formation of granulomas in *L. infantum*-infected mice and the inability of PS NP (in red) to reach its core after 24 h i.v. administration. Scale bar 200  $\mu$ m.

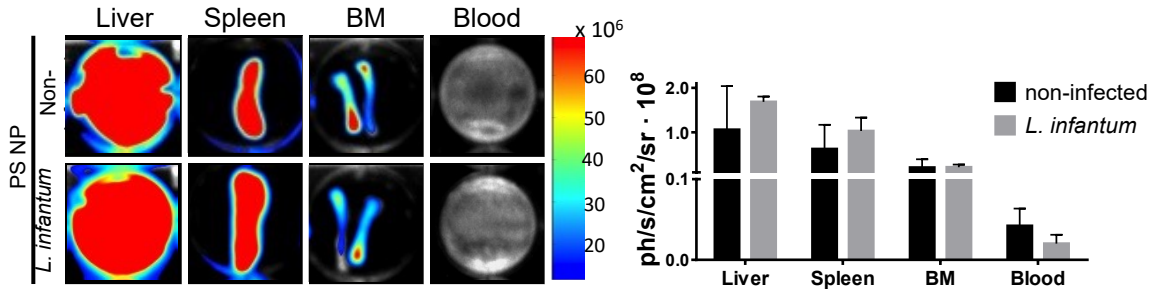

Figure 3. *In vivo* fluorescence of PS NP after 4 h i.v. injection of 2 mg/kg Cy5.5 in non-infected and *L. infantum*-infected organs. Scale expressed in  $\text{ph/s/cm}^2/\text{sr} \cdot 10^6$ . Data are expressed as mean  $\pm$  SD (n = 6).

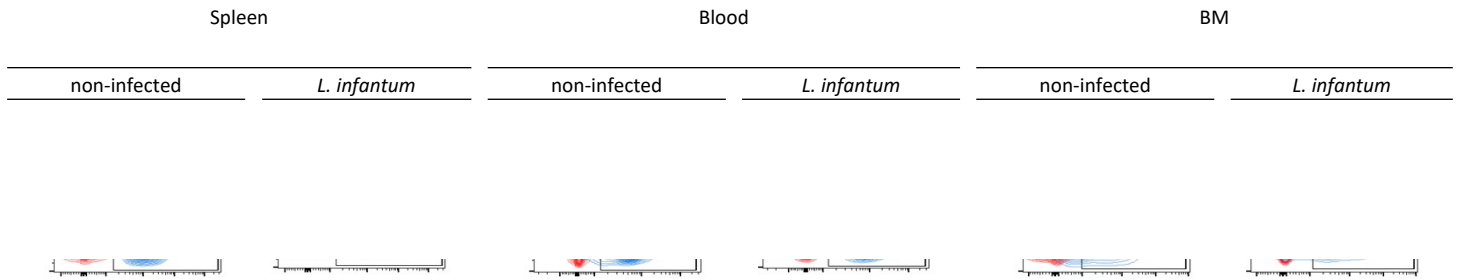

Figure 4. *In vivo* NP uptake in Spleen, Blood and BM of non-infected and *L. infantum*-infected mice after 4 h NP i.v. administration, at 2 mg/kg PS NP. Representative contour plots of each group (n = 6) of NP+ cells (in blue) vs their control (in red) are presented.

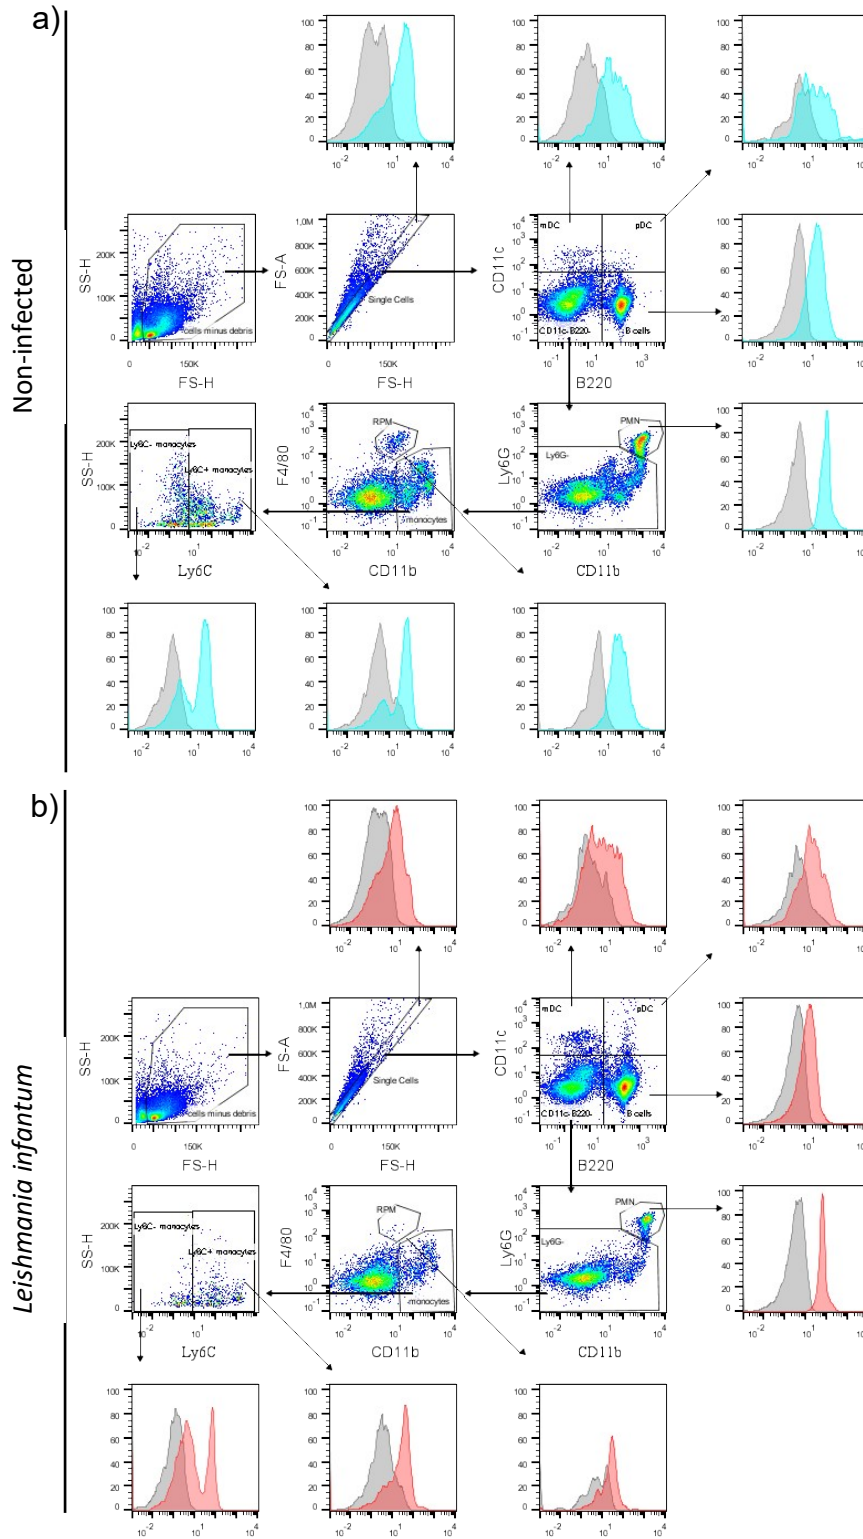

Figure 5. Immunophenotyping cells from the monocyte-phagocytic system in mouse spleen of a) non-infected and b) *L. infantum* infected mice treated with 0.2 mg/kg PS NP. Total mouse splenocytes from BALB/c mice were prepared as described in material and methods. Debris (SS-H vs FS-H) and doublets (FS-A vs FS-H) were excluded from mouse splenocytes. After gating out CD11c+ cells (B220- (mDC) and B220+ (pDC)) and B220+ cells (B cells), Ly6G+ (PMN) were gated out and the remaining Ly6G- cells were divided into two populations (F4/80 vs CD11b): RPM (F4/80+, CD11b<sup>int</sup>) and monocytes (CD11b+). Monocytes subpopulation was further divided into Ly6C+ and Ly6C- monocytes. The MFI of each population for AF700 of the control (grey histogram) and NP+ (a) blue histogram in non-infected and b) red histogram in *L. infantum* infected mice) is represented.

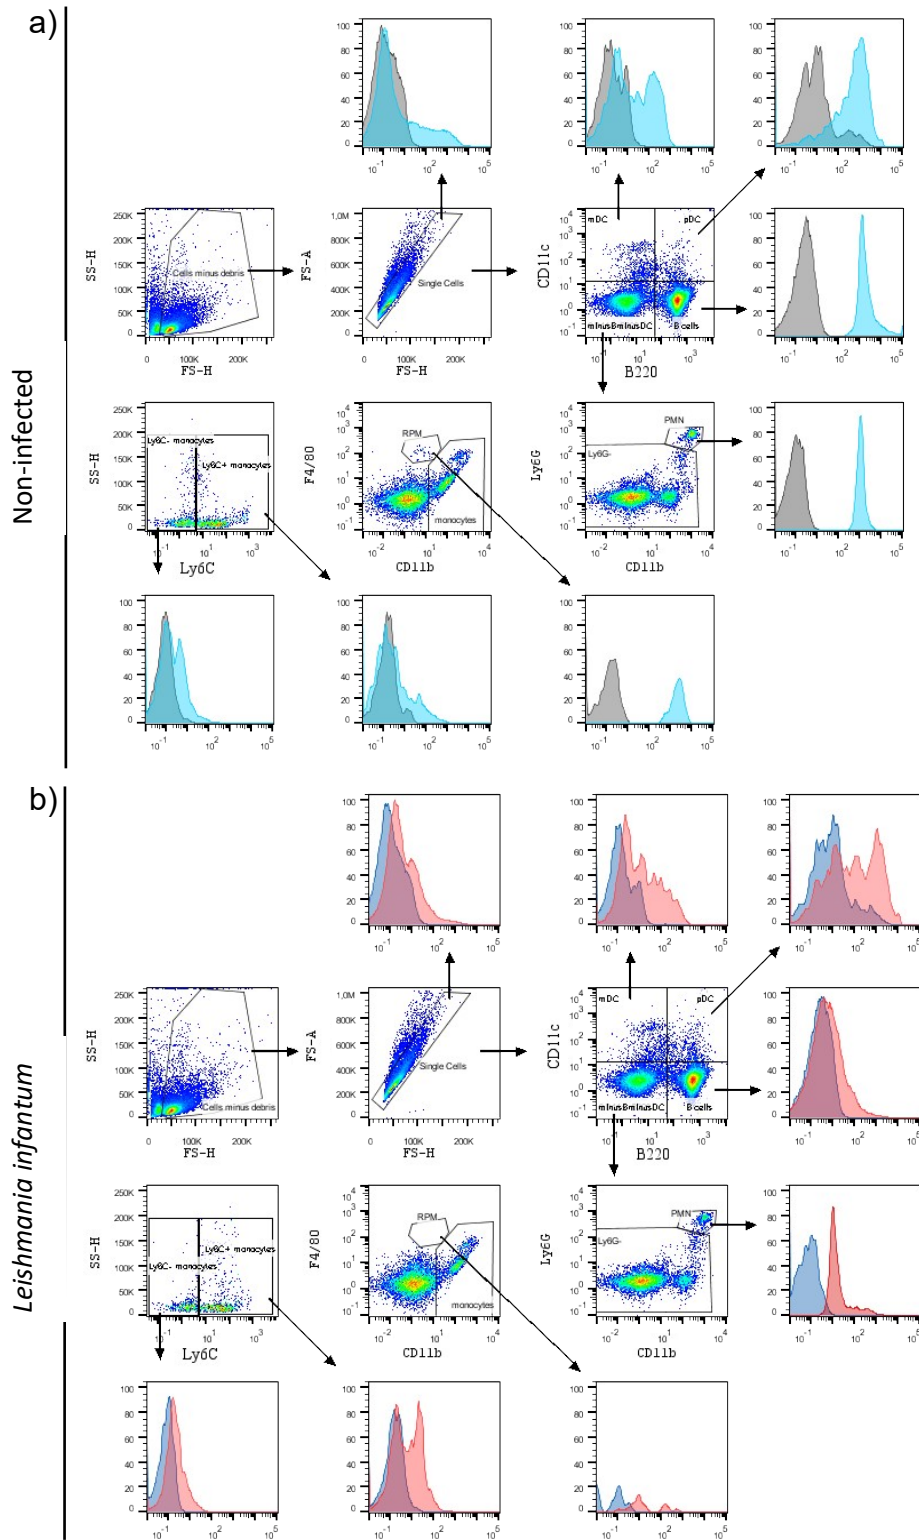

Figure 6. Immunophenotyping cells from the monocyte-phagocytic system in mouse spleen of a) non-infected and b) *L. infantum* infected mice treated with 0.5 mg/kg PLGA NP. Total mouse splenocytes from BALB/c mice were prepared as described in material and methods. Debris (SS-H vs FS-H) and doublets (FS-A vs FS-H) were excluded from mouse splenocytes. After gating out CD11c+ cells (B220- (mDC) and B220+ (pDC)) and B220+ cells (B cells), Ly6G+ (PMN) were gated out and the remaining Ly6G- cells were divided into two populations (F4/80 vs CD11b): RPM (F4/80+, CD11b<sup>int</sup>) and monocytes (CD11b+). Monocytes subpopulation was further divided into Ly6C+ and Ly6C- monocytes. The MFI of each population for APC of the control (grey histogram in non-infected and blue histogram in *L. infantum* infected mice) and NP+ (blue and red histograms for non infected and infected mice, respectively) is represented.

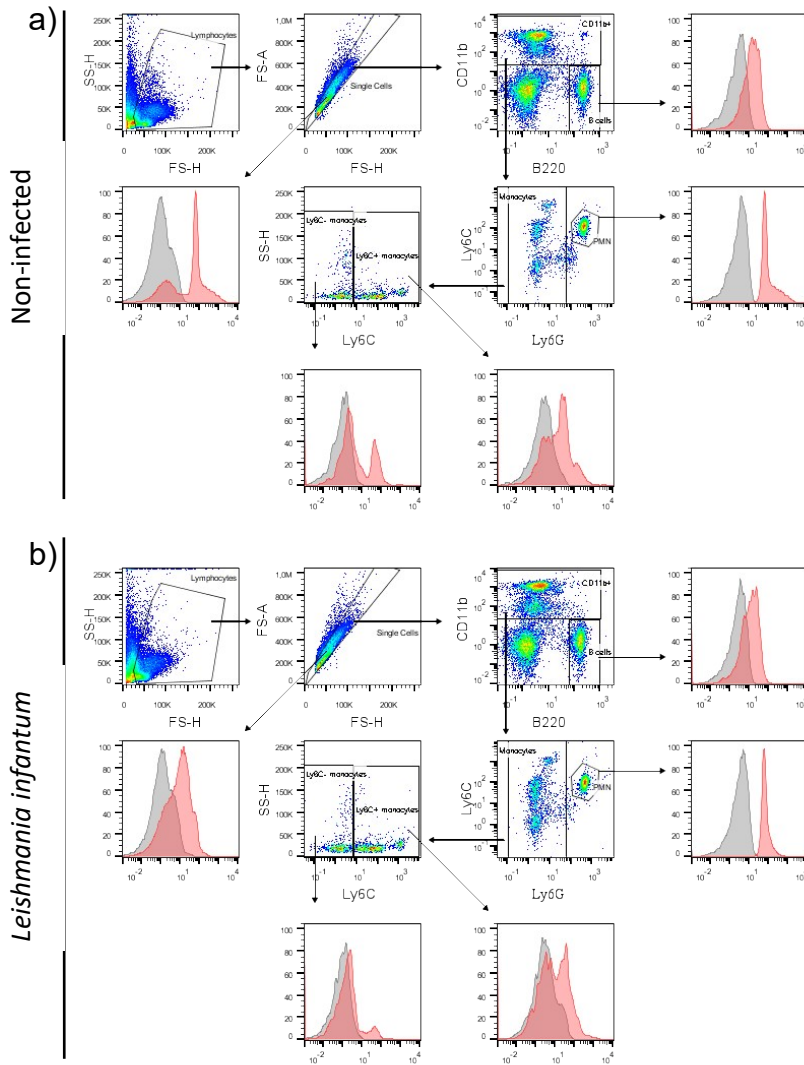

Figure 7. Immunophenotyping cells from the monocyte-phagocytic system in mouse blood of a) non-infected b) *L. infantum* infected mice at 0.2 mg/kg PS NP. Blood cells were prepared as described in material and methods. Debris (SS-H vs FS-H) and doublets (FS-A vs FS-H) were excluded from mouse splenocytes. After gating out B220+ cells (B cells), CD11b+ cells were divided into two populations (Ly6C vs Ly6G): Ly6G+ (PMN) and monocytes (Ly6G-). This last population was further divided into Ly6C+ and Ly6C- monocytes. The MFI of each population for AF700 of the control (grey histogram) and NP+ (a) red histogram is represented.

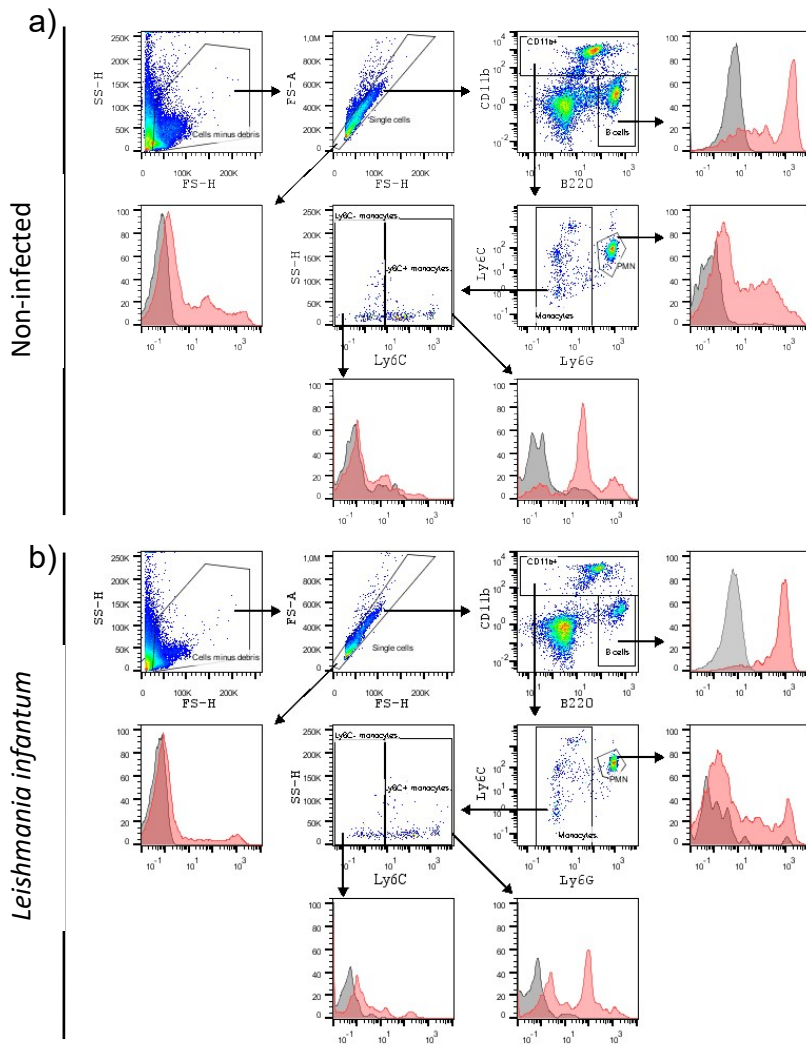

Figure 8. Immunophenotyping cells from the monocyte-phagocytic system in mouse blood of a) non-infected b) *L. infantum* infected mice at 0.5 mg/kg PGA-DiD NP. Blood cells were prepared as described in material and methods. Debris (SS-H vs FS-H) and doublets (FS-A vs FS-H) were excluded from mouse splenocytes. After gating out B220+ cells (B cells), CD11b+ cells were divided into two populations (Ly6C vs Ly6G): Ly6C+ (PMN) and monocytes (Ly6G-). This last population was further divided into Ly6C+ and Ly6C- monocytes. The MFI of each population for APC of the control (grey histogram) and NP+ (a) red histogram is represented.

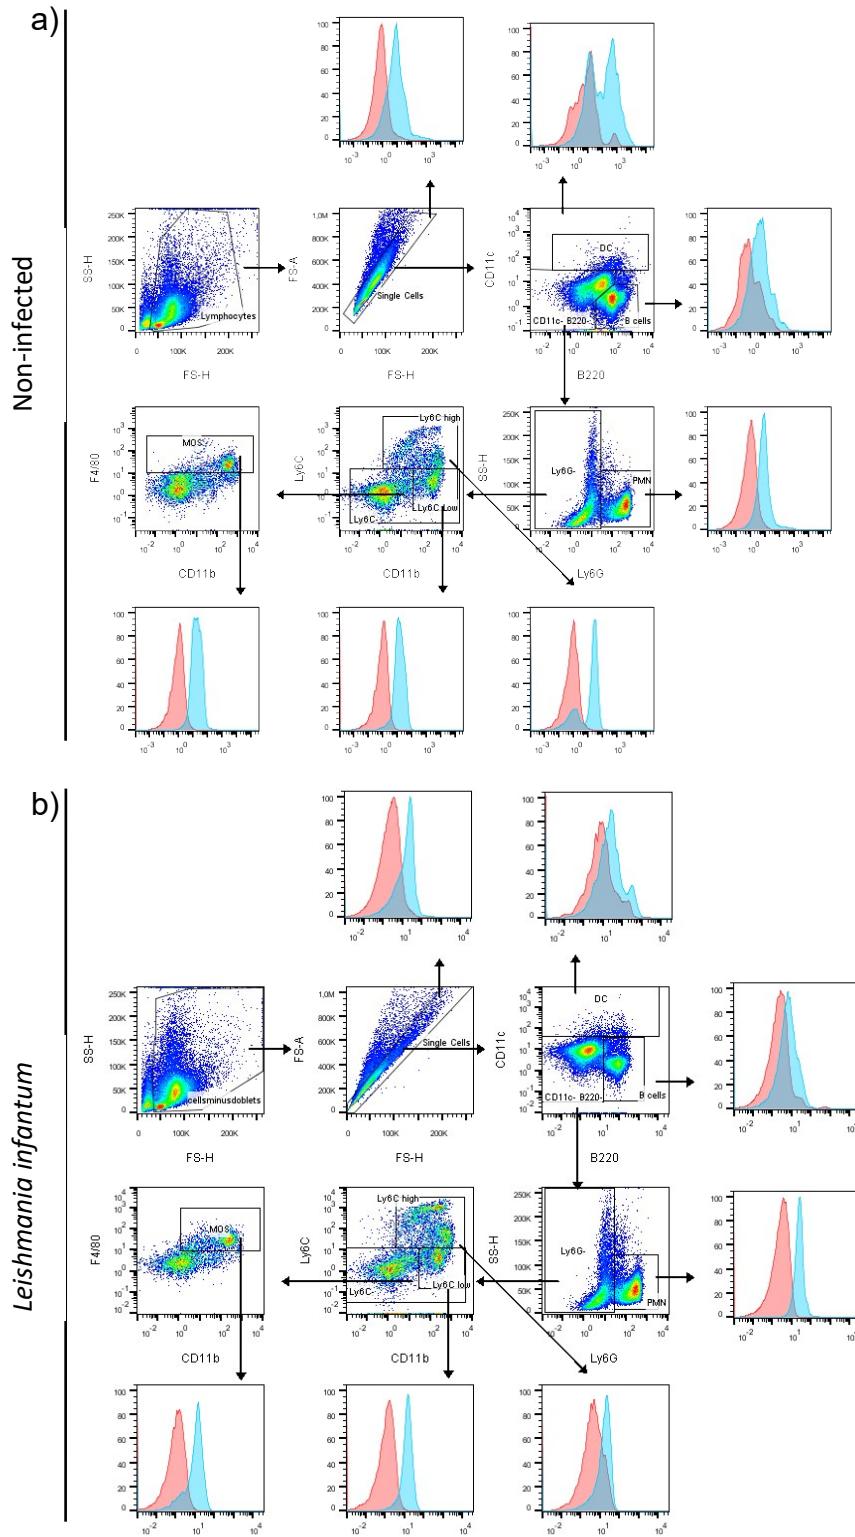

Figure 9. Immunophenotyping cells from the monocyte-phagocytic system in mouse BM of a) non-infected b) *L. infantum* infected mice at 0.2 mg/kg PS NP. Blood cells were prepared as described in material and methods. Debris (SS-H vs FS-H) and doublets (FS-A vs FS-H) were excluded from mouse splenocytes. After gating out B220+ cells (B cells) and CD11b+ cells (DC), Ly6G+ (PMN) were gated out and the remaining Ly6G- cells were divided into three populations (Ly6C vs CD11b): Ly6C<sup>high</sup>, Ly6C<sup>low</sup> and Ly6C-. Finally, MOS subset (F4/80+) was gated from Ly6C- (F4/80+ vs CD11b). The MFI of each population for AF700 of the control (red histogram) and NP+ (a) blue histogram is represented.



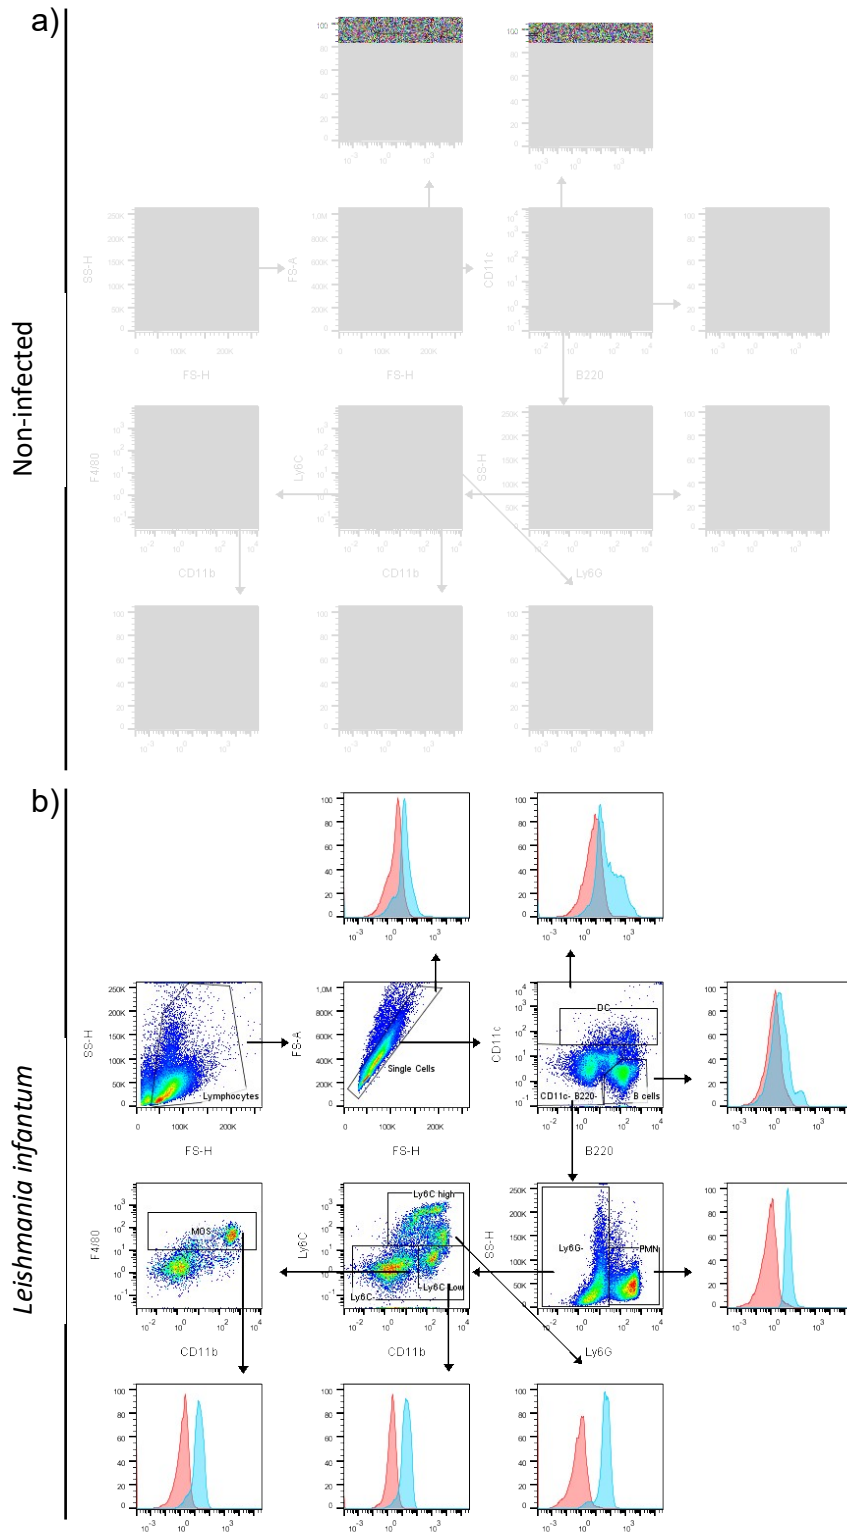

Figure 10. Immunophenotyping cells from the monocyte-phagocytic system in mouse BM of a) non-infected b) *L. infantum* infected mice at 0.5 mg/kg PLGA NP. Blood cells were prepared as described in material and methods. Debris (SS-H vs FS-H) and doublets (FS-A vs FS-H) were excluded from mouse splenocytes. After gating out B220+ cells (B cells) and CD11b+ cells (DC), Ly6G+ (PMN) were gated out and the remaining Ly6G- cells were divided into three populations (Ly6C vs CD11b): Ly6C<sup>high</sup>, Ly6C<sup>low</sup> and Ly6C-. Finally, MOS subset (F4/80+) was gated from Ly6C- (F4/80 vs CD11b). The MFI of each population for AF700 of the control (red histogram) and NP+ (a) blue histogram is represented.
